# Supplementary material
Source: PubMed Central journal article supplement (PMC3947021)
Supplement: NIHMS520857-supplement-3.pdf [file NIHMS520857-supplement-3.pdf]

**Table 1. Flow cytometry of 4T1 cell lines**

---

| <b>Cell Type</b>              | <b><math>\alpha</math>2 integrin</b> | <b><math>\alpha</math>6 integrin</b> | <b><math>\beta</math>1 integrin</b> |
|-------------------------------|--------------------------------------|--------------------------------------|-------------------------------------|
| <b>WT</b>                     | 90 <sup>1</sup>                      | 59                                   | 38                                  |
| <b><math>\alpha</math>3si</b> | 87                                   | 54                                   | 51                                  |
| <b><math>\alpha</math>3RX</b> | 60                                   | 50                                   | 39                                  |

---

<sup>1</sup> All values reported as background-subtracted geometric mean fluorescence intensity.
