# Supplementary material
Source: PubMed Central journal article supplement (PMC3947021)

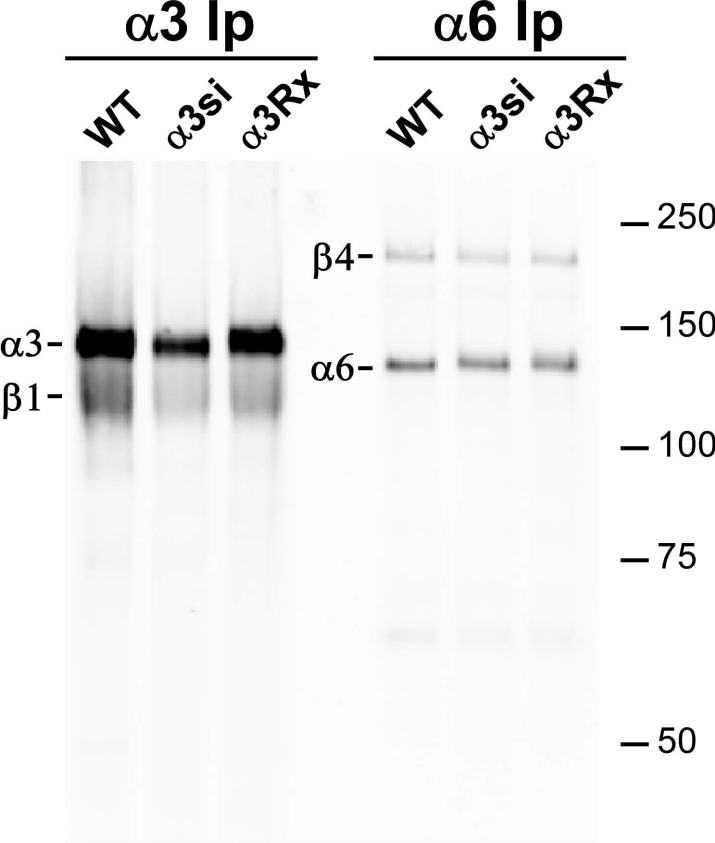

Figure S1

**A**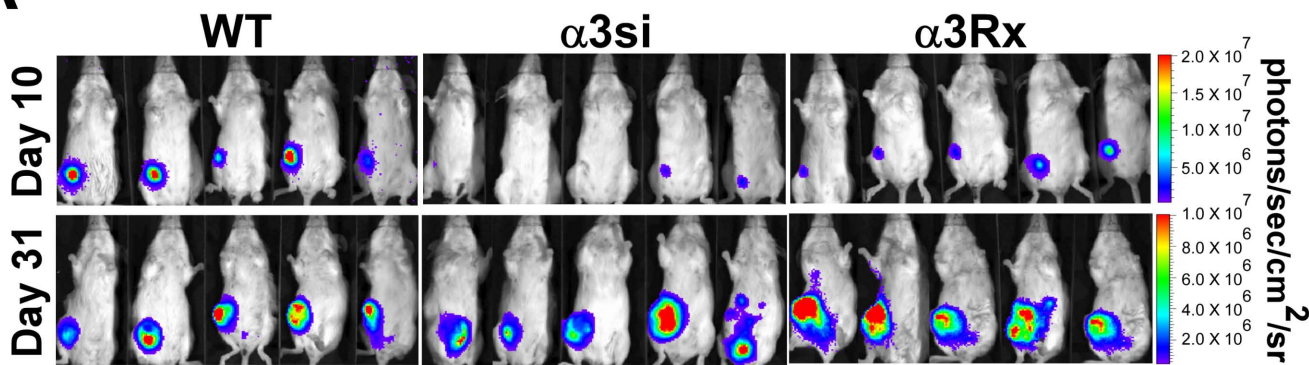**B**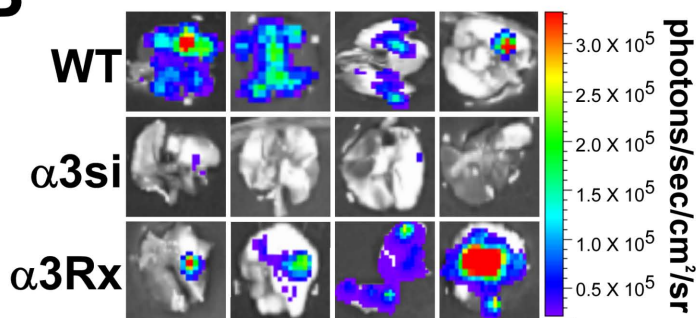**C**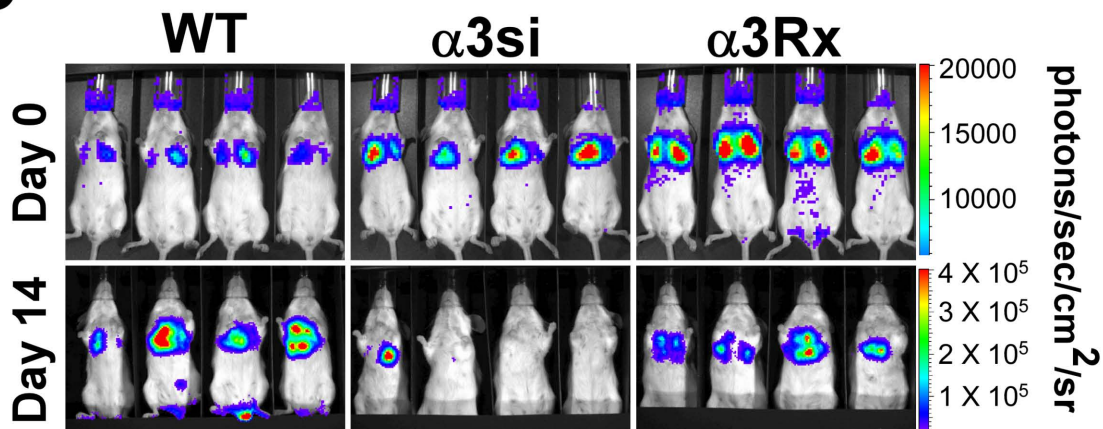

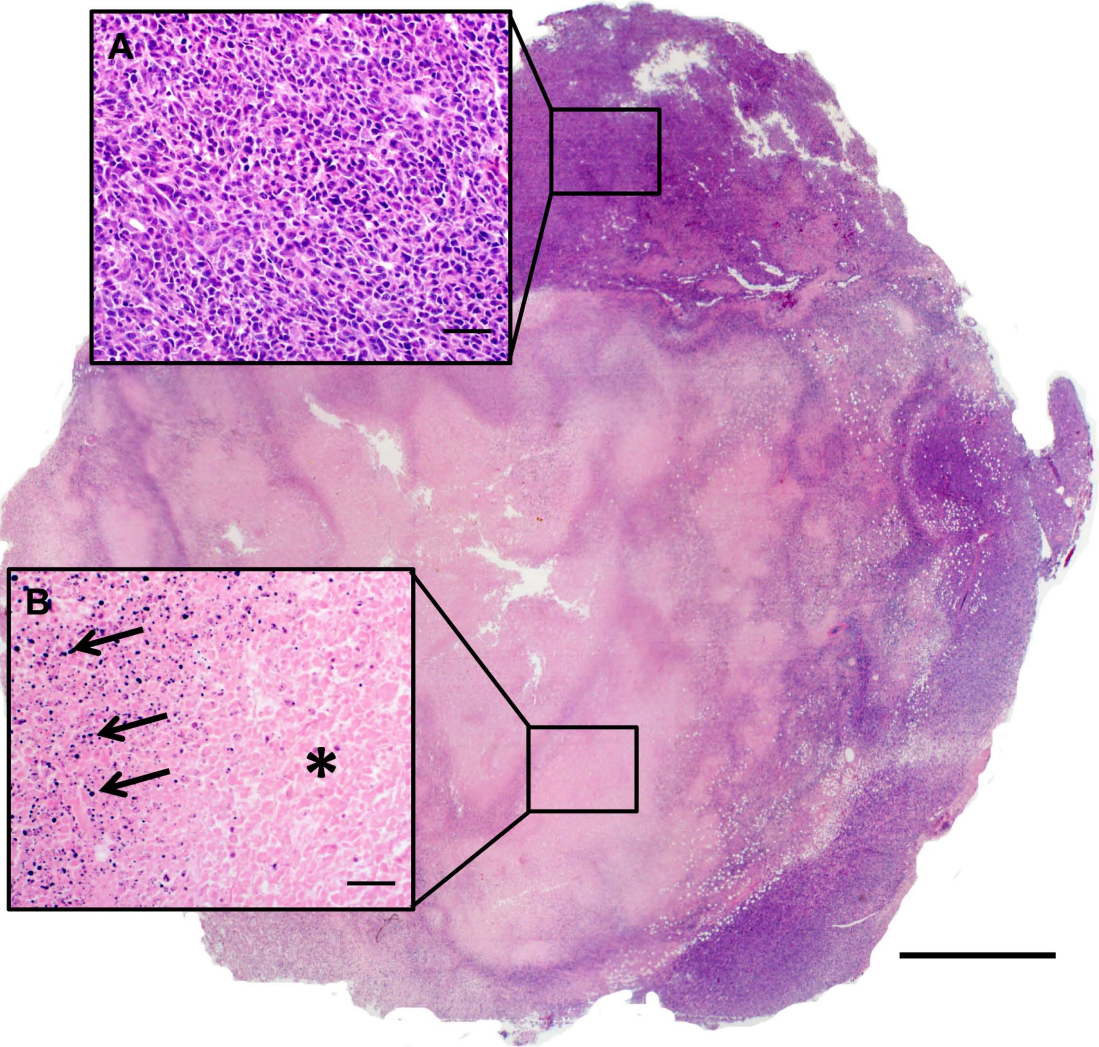

Figure S3

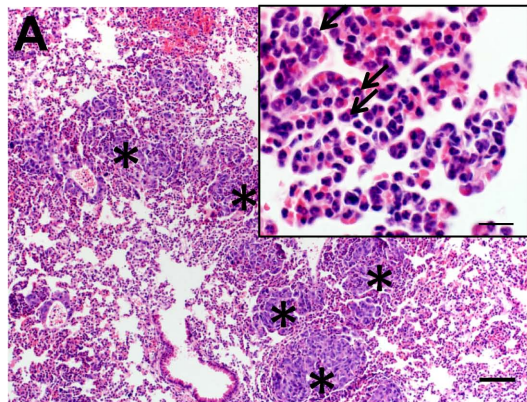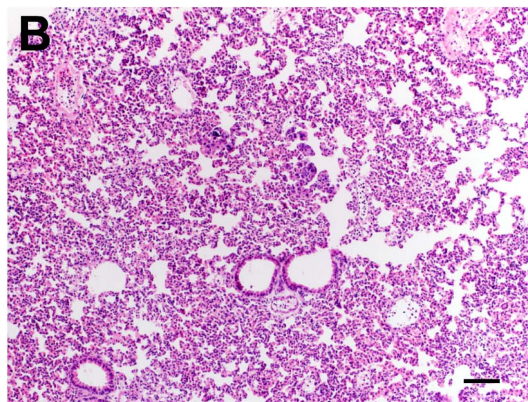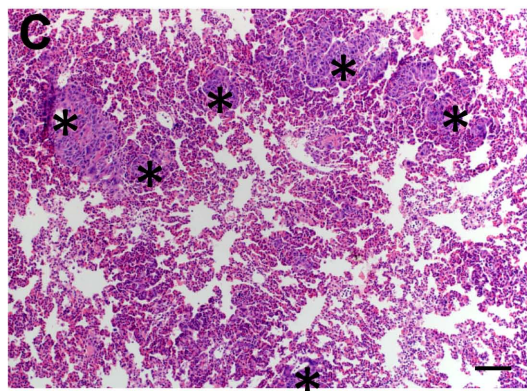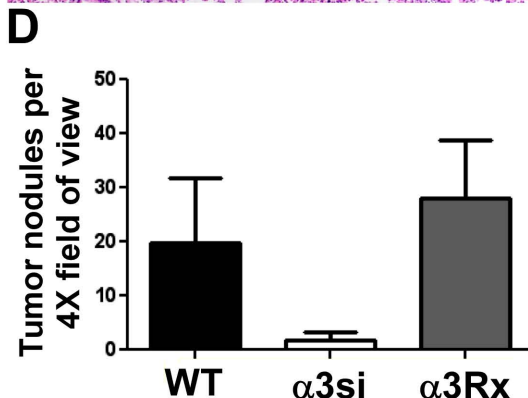

Figure S4

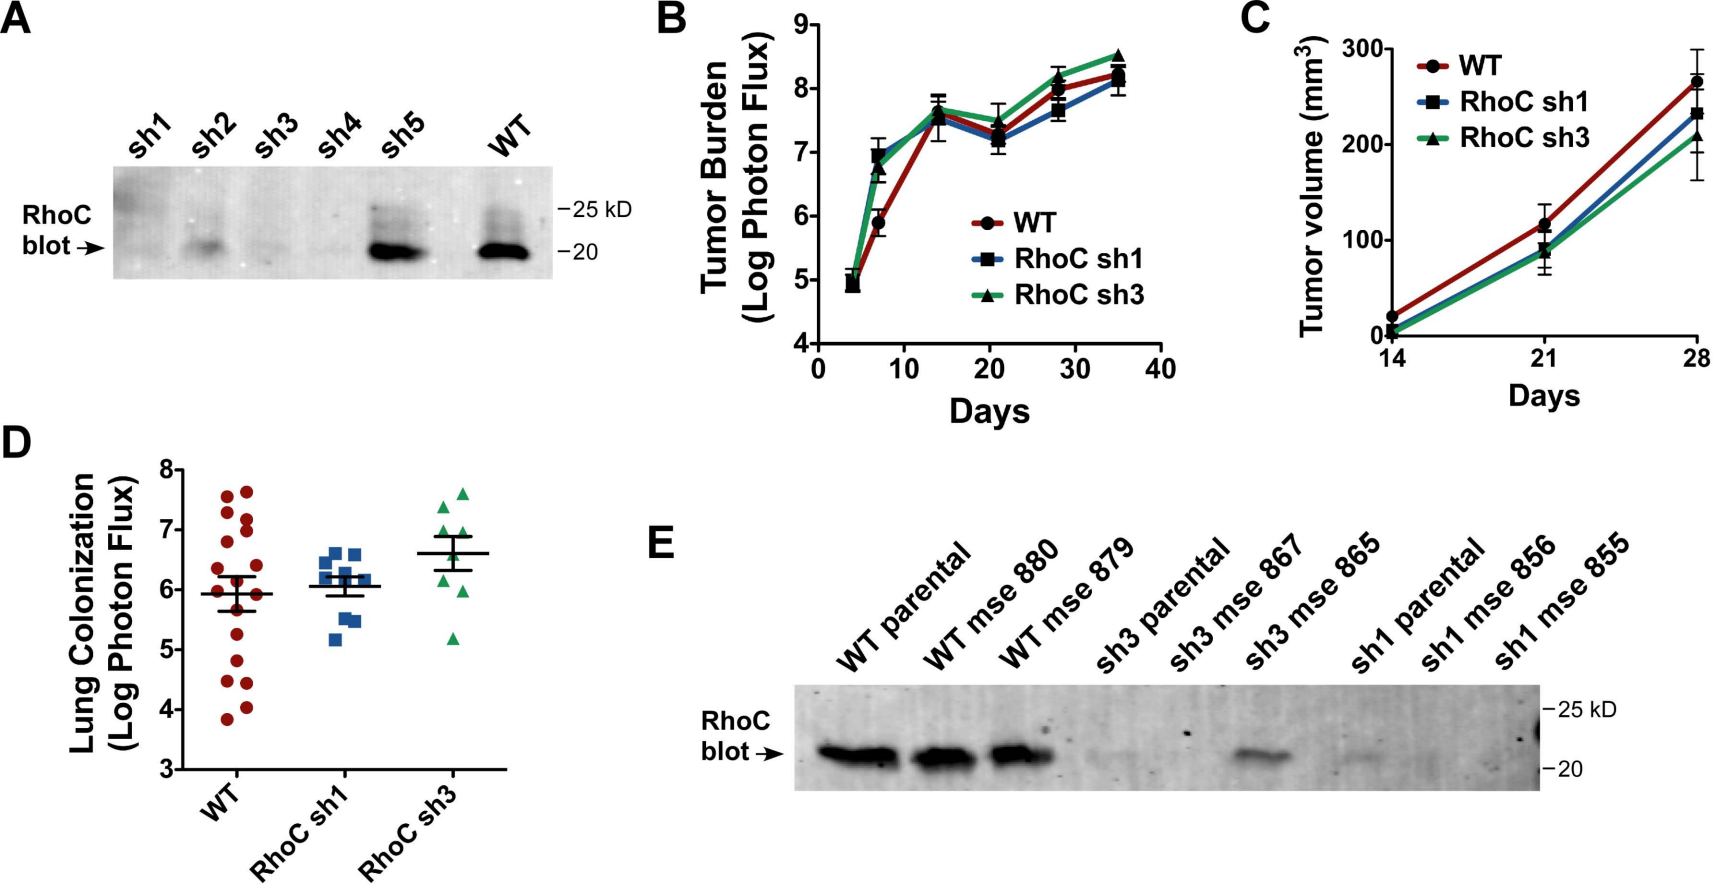

Figure S5

**A**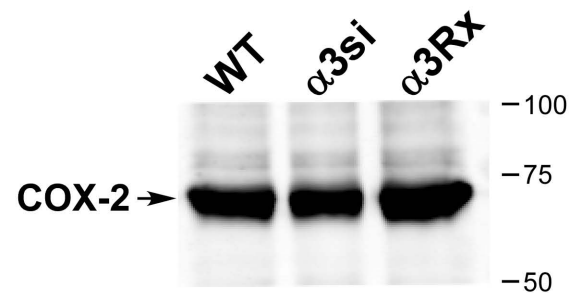**B**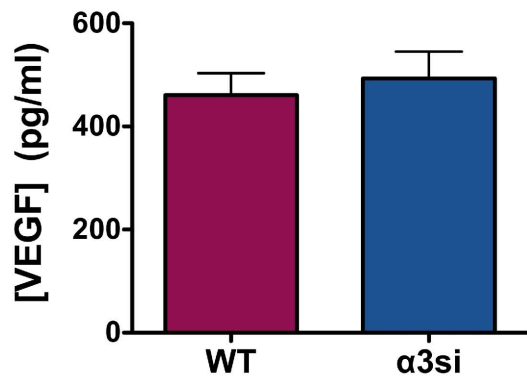**C**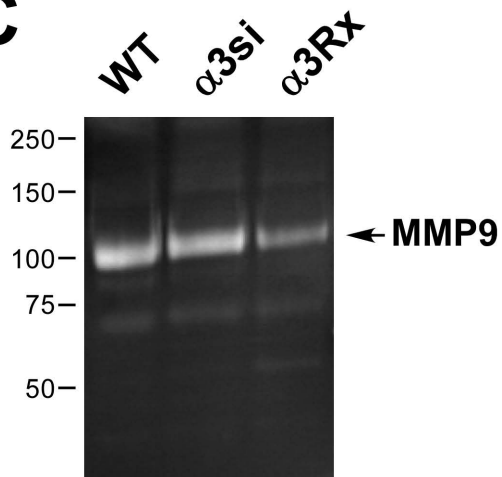**D**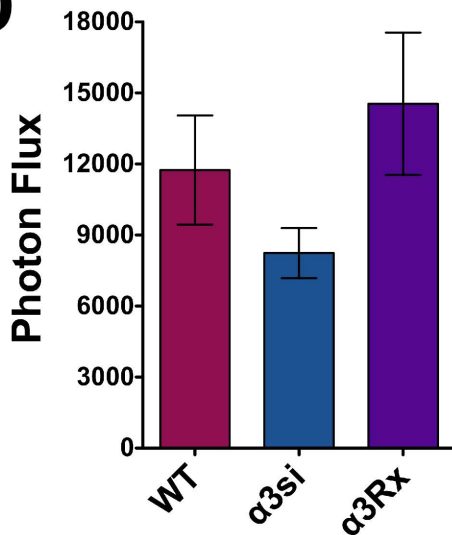

Figure S6

**A****EGW593.lu****A431****LM-332**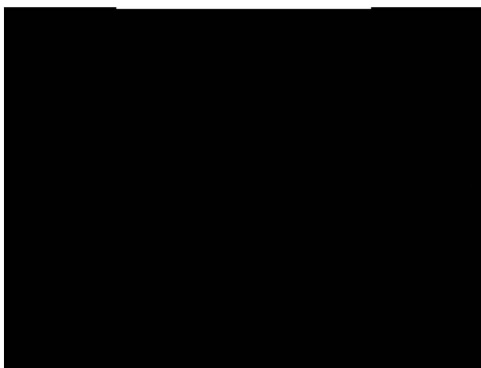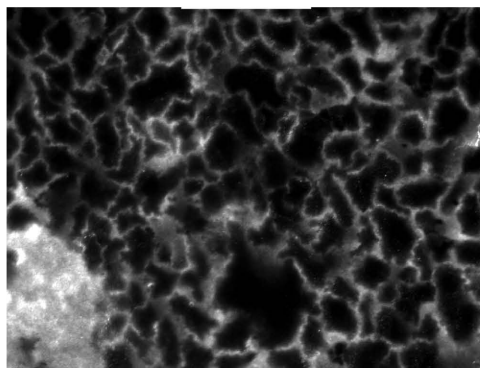**LM-511**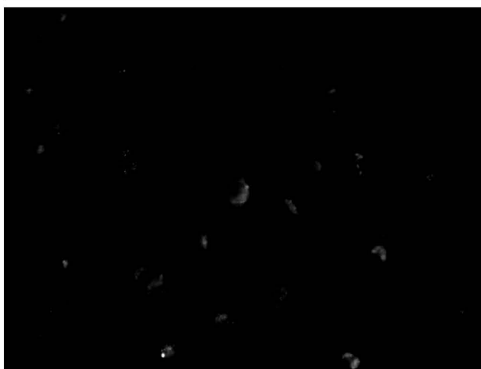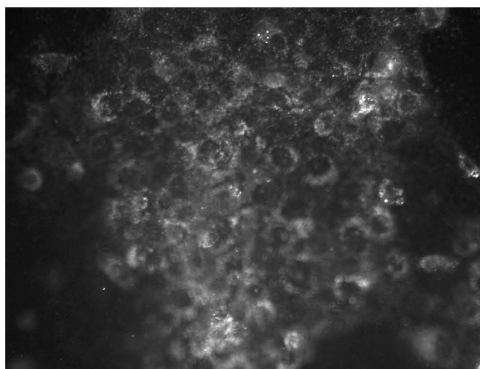**NEG**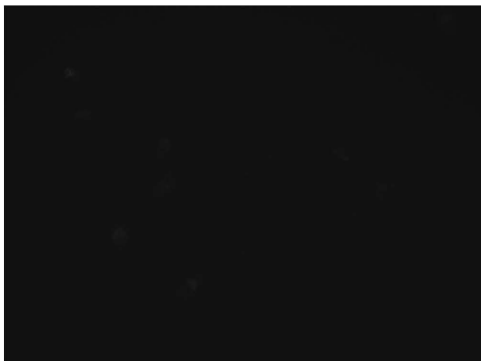**B**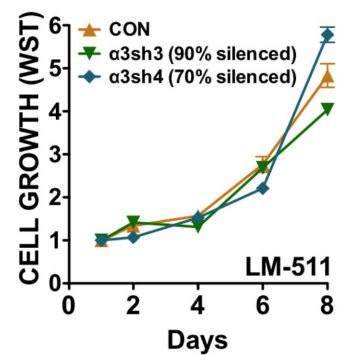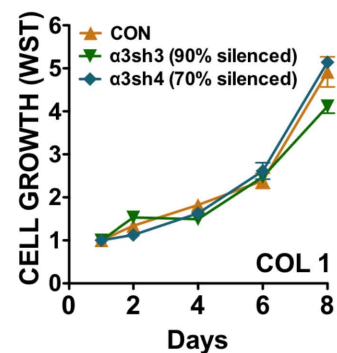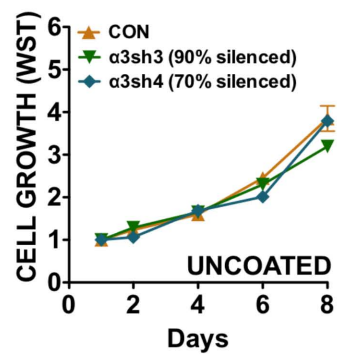

Figure S7

Supplement: NIHMS520857-supplement-1.pdf [file NIHMS520857-supplement-1.pdf]
